# Supplementary material for: Apoptotic CD8 T-lymphocytes disable macrophage-mediated immunity to Trypanosoma cruzi infection
Source: PubMed Central journal article supplement (PMC4917666; doi:10.1038/cddis.2016.135), 2016-05-19
Supplement: cddis2016135x2.pdf [file cddis2016135x2.pdf]

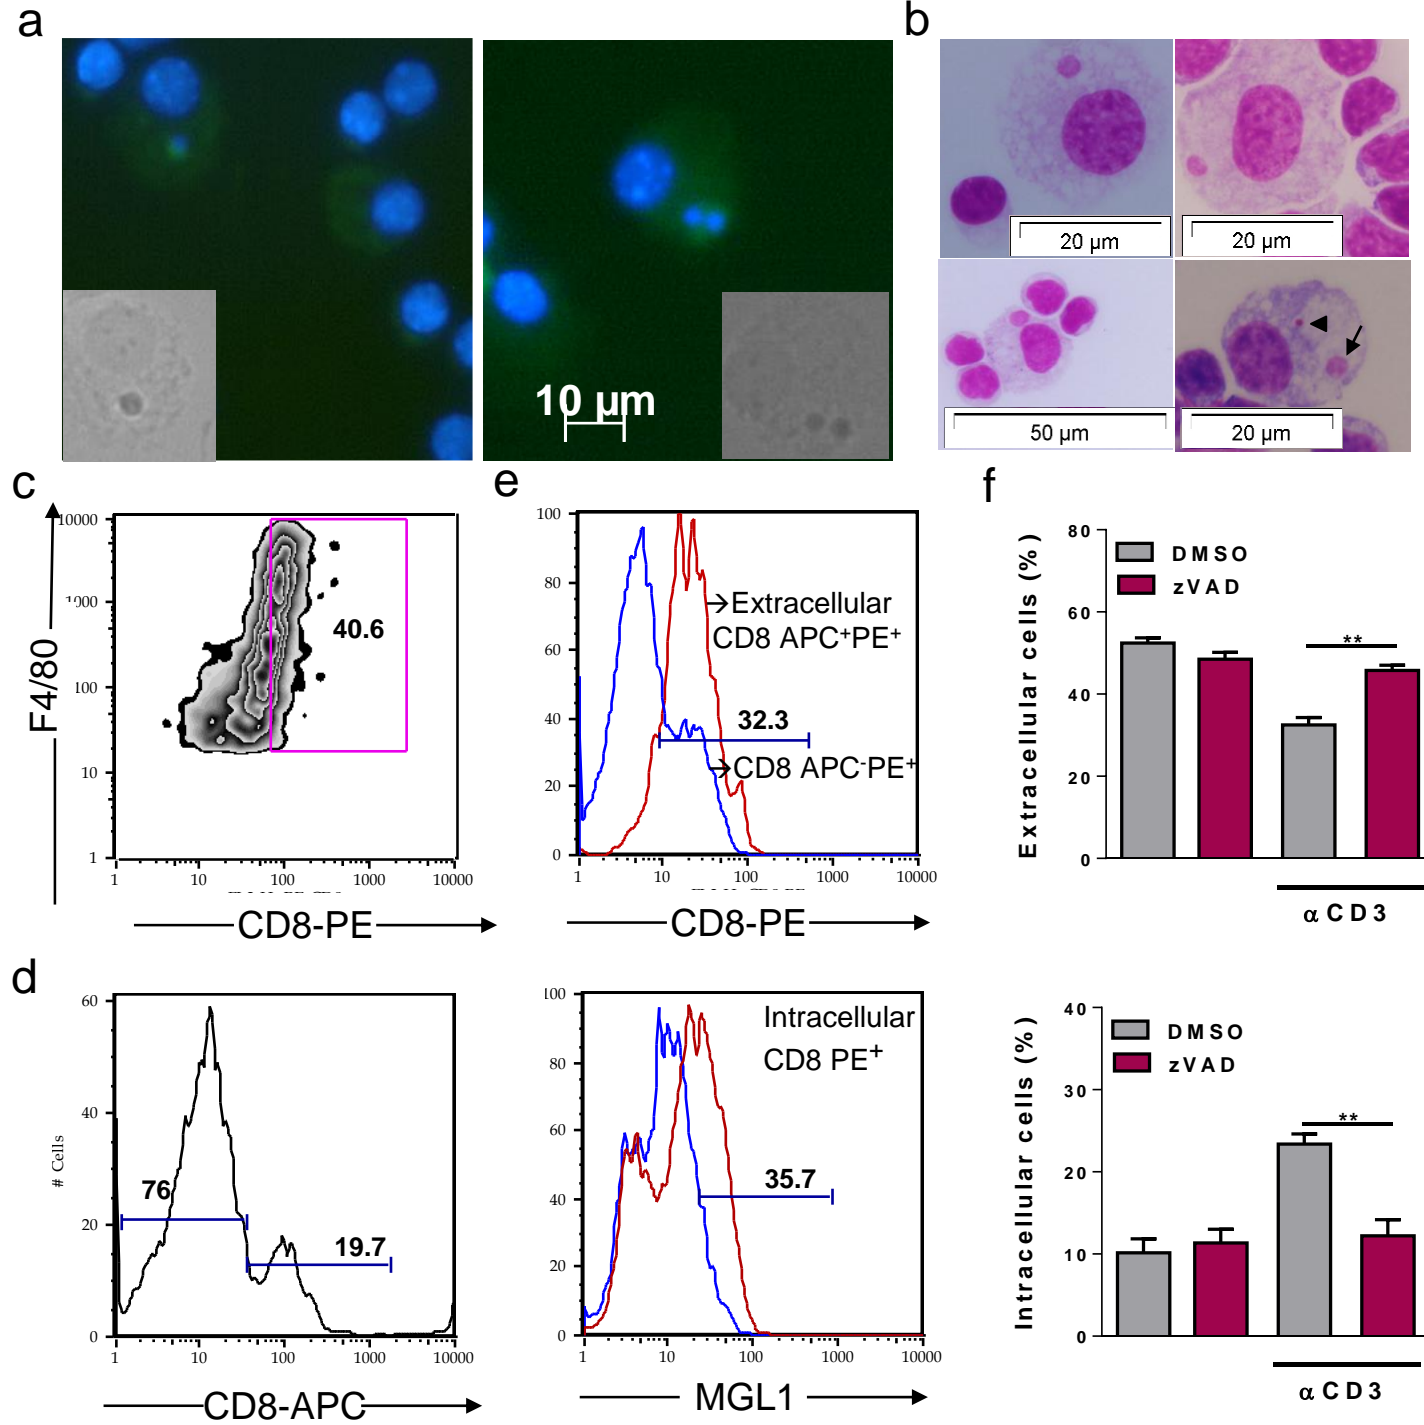

**Figure S2.** Efferocytosis by macrophages from infected mice. Efferocytosis by PECs from *T. cruzi*-infected mice in (a-b) cytopspins (18-22 dpi) and (c-f) flow cytometry. (a) DAPI/MGL1 staining and bright field (b) panoptic staining. Inset: arrow indicates an apoptotic body and arrow head points to a *T. cruzi* parasite. (c-f) Macrophages bearing CD8<sup>+</sup> events. PECs were first stained for surface markers (APC-CD8, F4/80, MGL1/rat IgG2a), permeabilized, and then stained with PE-labeled anti-CD8 or rat IgG2a). (c) F4/80<sup>+</sup> macrophages were evaluated for intracellular PE-CD8 staining. Gate was based on isotype control mAb (PE-IgG2a, 7 %). (d) Extracellular (APC<sup>+</sup>) CD8 cells and APC<sup>neg</sup> cells were further analyzed in e for intracellular PE<sup>+</sup> CD8 staining. (e) Intracellular CD8<sup>+</sup> events in MGL1<sup>+</sup> macrophages. APC<sup>+</sup> CD8 T cells stains with PE-anti-CD8 and were used as a positive control (red line). Intracellular CD8<sup>+</sup> events within APC<sup>neg</sup> cells (blue line) were gated and further analyzed for MGL-1 expression (red line) or control AF-IgG2a mAb (blue line) in bottom panel. (f) zVAD reduces lymphocyte apoptosis and efferocytosis by macrophages. Purified CD8 T cells (4 x 10<sup>6</sup>/well) were treated with zVAD (80 μM or DMSO (0.4 %)) and washed before coculture with PECs (1.5 x 10<sup>6</sup>/well) from infected mice. Cocultures were stimulated or not with plate-bound anti-CD3 in triplicates. Upper panel depicts extracellular CD8 T cells and bottom panel shows intracellular CD8<sup>+</sup> events, evaluated as above. Significant differences are indicated (\*) as analyzed by t test.
